# Supplementary material for: Identification and expression analysis of putative chemoreception genes from Cyrtorhinus lividipennis (Hemiptera: Miridae) antennal transcriptome
Source: PubMed Central journal article supplement (PMC6113244; doi:10.1038/s41598-018-31294-9), 2018-08-28
Supplement: 41598_2018_31294_MOESM1_ESM.pdf [file 41598_2018_31294_MOESM1_ESM.pdf]

**Supplementary Information for**

**Identification and expression analysis of putative chemoreception genes from *Cyrtorhinus lividipennis* (Hemiptera: Miridae) antennal transcriptome**

Gui-Yao Wang, Jing-Lei Zhu, Wen-Wu Zhou, Su Liu, Quais Md Khairul, Naved Ahmad Ansari, Zeng-Rong Zhu\*

State Key Laboratory of Rice Biology; Key Laboratory of Molecular Biology of Crop Pathogens and Insects, Ministry of Agriculture; Institute of Insect Sciences, Zhejiang University, Hangzhou, Zhejiang, 310058, China

Email addresses:

**Gui-Yao Wang:** wangguiyao@yeah.net

**Jing-Lei Zhu:** 21716101@zju.edu.cn

**Wen-Wu Zhou:** wenwuzhou@zju.edu.cn

**Su Liu:** suliu@ahau.edu.cn

**Quais Md Khairul:** quaisbau@yahoo.com

**Naved Ahmad Ansari:** navedahmad321@yahoo.com

**Zeng-Rong Zhu:** zrzhu@zju.edu.cn

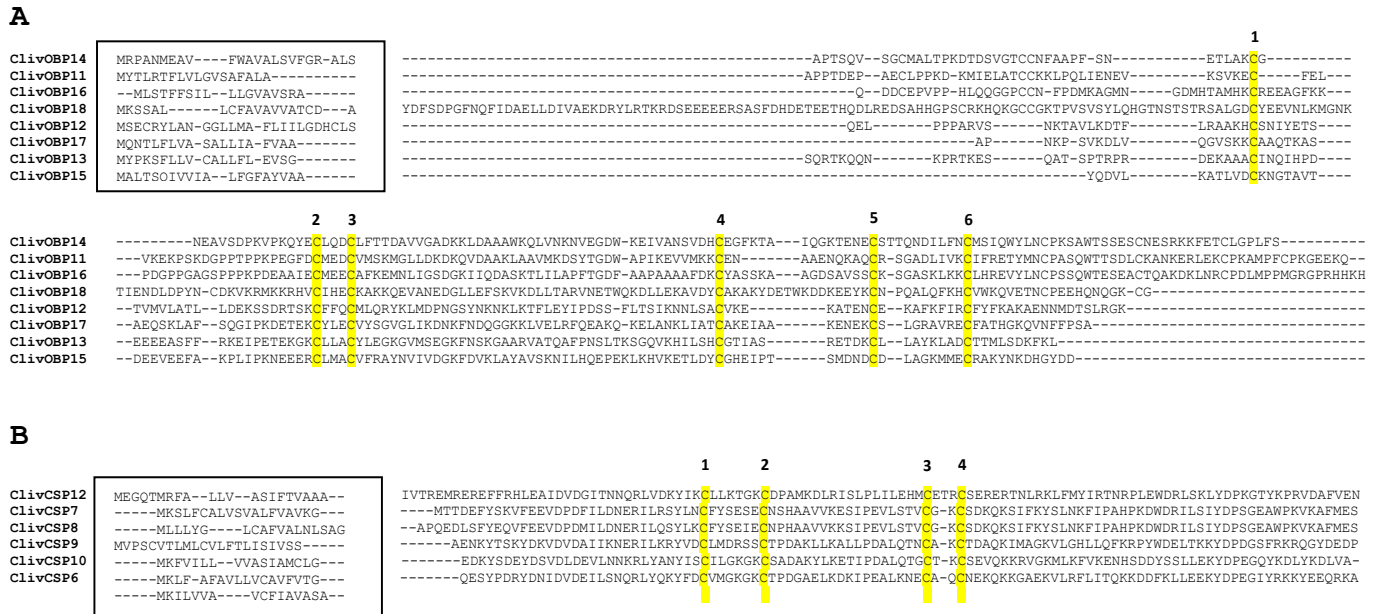

**Supplementary Figure S1.** Multiple sequence alignment of *C. lividipennis* OBPs (A) and *C. lividipennis* CSPs (B). The predicted signal peptide (inside the box) were depicted separately from the sequences of the native proteins. The conserved cysteine residues were in yellow bands and marked by Arabic numbers 1–6.

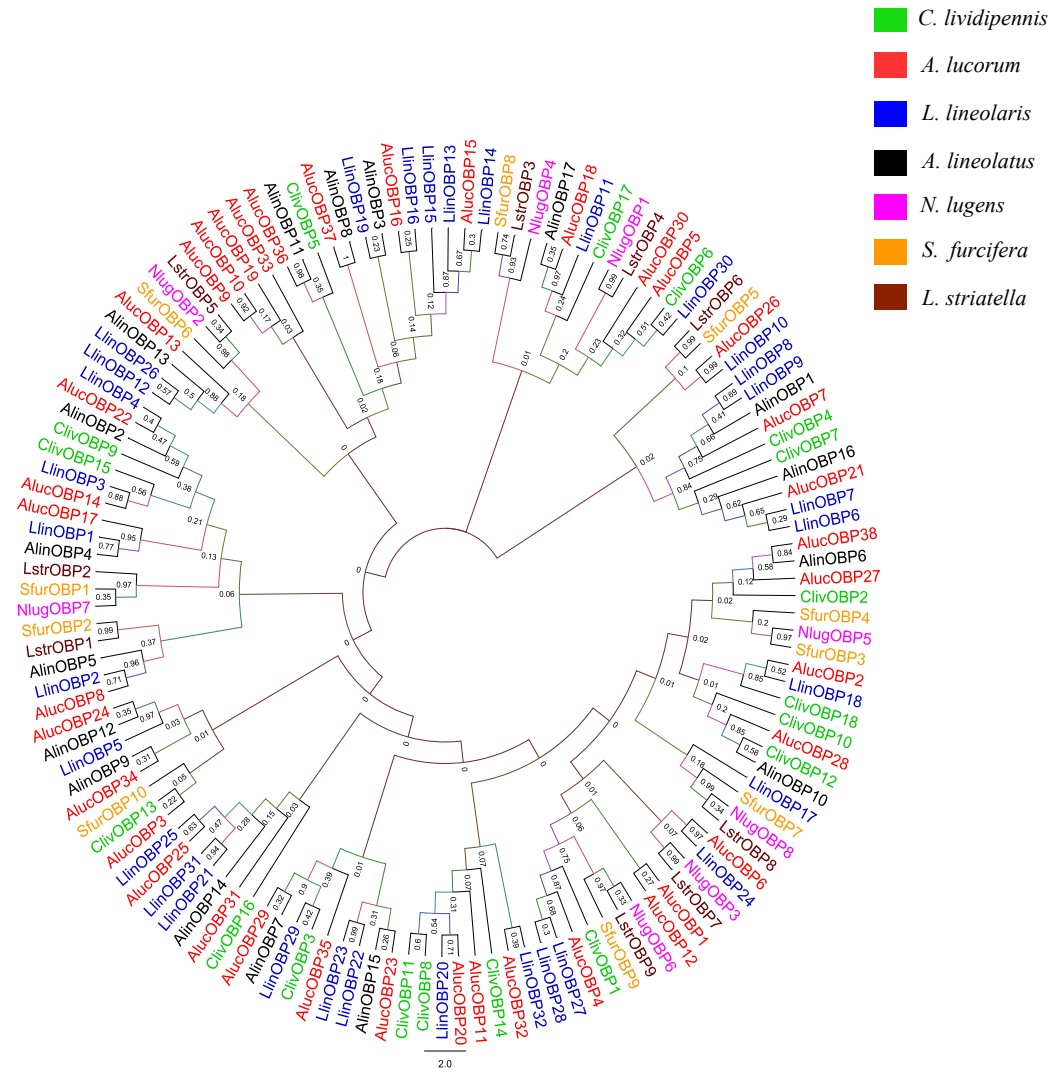

**Supplementary Figure S2.** Phylogenetic analysis of 132 OBPs from various hemipteran insects. Cliv, *Cyrtorhinus lividipennis*; Aluc, *Apolygus lucorum*; Llin, *Lygus lineolaris*; Alin, *Adelphocoris lineolatus*; Nlug, *Nilaparvata lugens*; Sfur, *Sogatella furcifera*; Lstr, *Laodelphax striatella*.

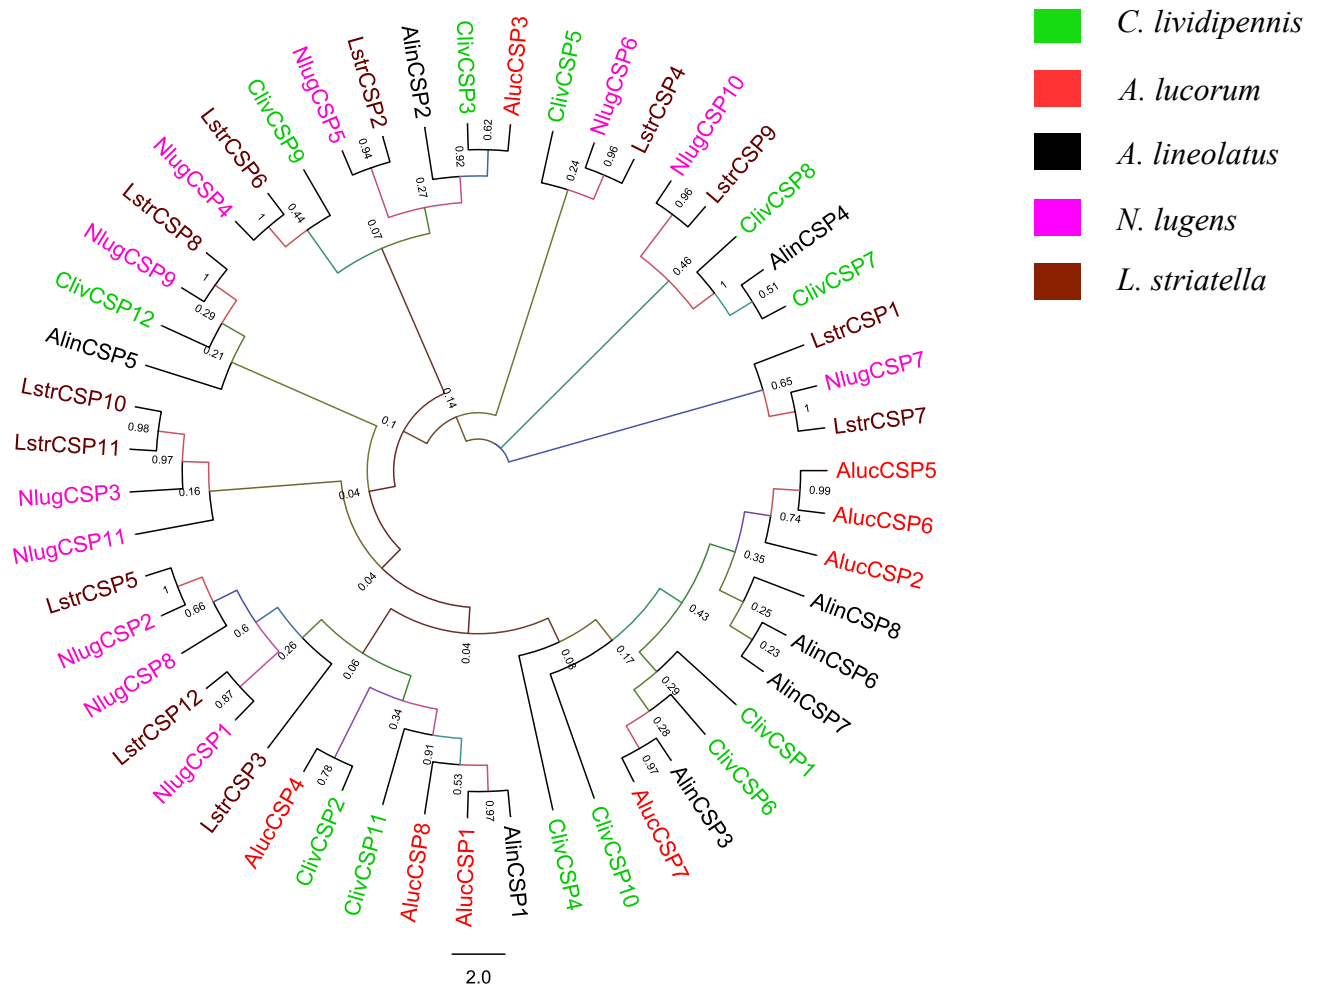

**Supplementary Figure S3.** Phylogenetic analysis of CSPs from hemipteran insects. Cliv, *Cyrtorhinus lividipennis*; Aluc, *Apolygus lucorum*; Alin, *Adelphocoris lineolatus*; Nlug, *Nilaparvata lugens*; Lstr, *Laodelphax striatella*.

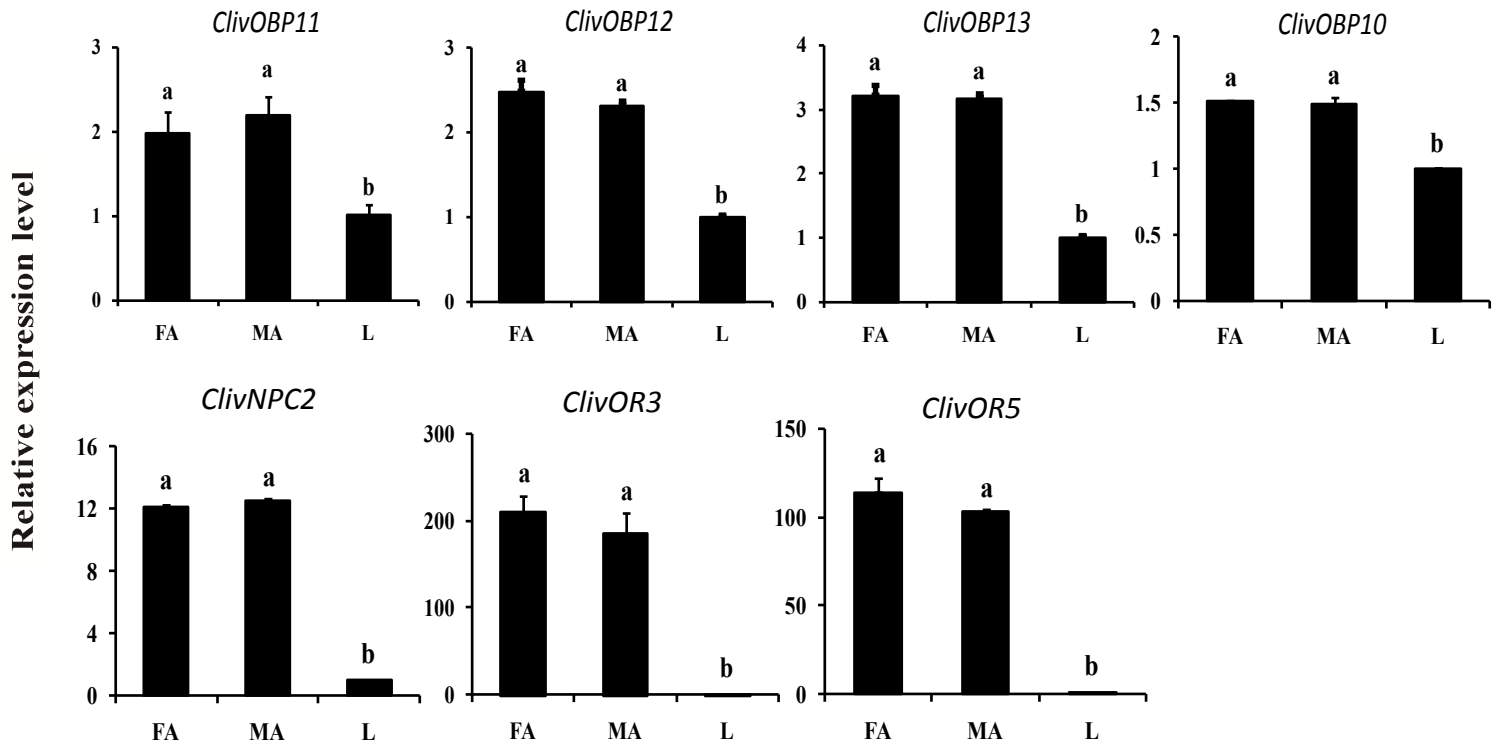

**Supplementary Figure S4.** The chemosensory genes that showed similar transcript levels in both male and female antennae. Gene expression patterns in antennae were normalized relative to legs (male and female mixture). Data were presented as the mean of three replicates ( $n=3$ )  $\pm$  SE. Different lower cases indicate significant differences ( $p < 0.05$ ). FA: female antennae, MA: male antennae, L: legs.

**Supplementary Table S1.** Overview of the sequencing and assembly process.

|                                                                          | MA (male)  | FA (female) |
|--------------------------------------------------------------------------|------------|-------------|
| Total Raw Reads                                                          | 62,553,216 | 55,283,884  |
| Total Clean Reads                                                        | 60,658,602 | 53,853,286  |
| Clean Reads GC (%)                                                       | 42.02      | 42.08       |
| Clean Reads Q20 (%)                                                      | 96.73      | 96.70       |
| Clean Reads Q30 (%)                                                      | 91.97      | 91.91       |
| Combined Trinity assembly of the male and female antennal transcriptomes |            |             |
| Total Unigenes Number                                                    | 62,637     |             |
| Unigene Min Length (bp)                                                  | 201        |             |
| Unigene Max length (bp)                                                  | 36,074     |             |
| Unigene Mean Length (bp)                                                 | 1,401      |             |
| Unigene N50                                                              | 2,338      |             |
| Unigene N90                                                              | 588        |             |

**Supplementary Table S2.** Summary of *OBP*, *CSP* and *NPC2* genes identified in *C. lividipennis*.

| Gene name        | Acc. no. | ORF (aa) | SP (aa) | Full length | BLASTX best hit                |                                |                |          |              |
|------------------|----------|----------|---------|-------------|--------------------------------|--------------------------------|----------------|----------|--------------|
|                  |          |          |         |             | Gene name                      | Species                        | Acc. no.       | E value  | Identity (%) |
| <i>ClivOBP11</i> | MG751808 | 194      | 18      | Yes         | <i>OBP20</i>                   | <i>Apolygus lucorum</i>        | AMQ76473       | 4.00E-51 | 49           |
| <i>ClivOBP12</i> | MG751809 | 162      | 26      | Yes         | <i>OBP10</i>                   | <i>Adelphocoris lineolatus</i> | ACZ58081       | 2.00E-51 | 59           |
| <i>ClivOBP13</i> | MG751810 | 154      | 19      | Yes         | <i>OBP34</i>                   | <i>Apolygus lucorum</i>        | AMQ76487       | 3.00E-64 | 67           |
| <i>ClivOBP14</i> | MG751811 | 185      | 23      | Yes         | <i>OBP11</i>                   | <i>Apolygus lucorum</i>        | AFJ54052       | 2.00E-60 | 47           |
| <i>ClivOBP15</i> | MG751812 | 139      | 20      | Yes         | <i>OBP3</i>                    | <i>Lygus lineolaris</i>        | AHF71030       | 1.00E-72 | 98           |
| <i>ClivOBP16</i> | MG751813 | 202      | 18      | Yes         | <i>OBP25</i>                   | <i>Lygus lineolaris</i>        | AHF71056       | 1.00E-27 | 44           |
| <i>ClivOBP17</i> | MG751814 | 145      | 19      | Yes         | <i>OBP11</i>                   | <i>Lygus lineolaris</i>        | AHF71038       | 5.00E-61 | 75           |
| <i>ClivOBP18</i> | MG751815 | 248      | 19      | Yes         | <i>OBP18a</i>                  | <i>Lygus lineolaris</i>        | AHF71046       | 3.00E-66 | 72           |
| <i>ClivCSP6</i>  | MG751817 | 131      | 18      | Yes         | <i>CSP6</i>                    | <i>Adelphocoris lineolatus</i> | ACZ58024       | 8.00E-54 | 71           |
| <i>ClivCSP7</i>  | MG751818 | 126      | 19      | Yes         | <i>CSP4</i>                    | <i>Adelphocoris suturalis</i>  | ANA10246       | 1.00E-65 | 81           |
| <i>ClivCSP8</i>  | MG751819 | 127      | 18      | Yes         | <i>CSP4</i>                    | <i>Adelphocoris suturalis</i>  | ANA10246       | 4.00E-62 | 75           |
| <i>ClivCSP9</i>  | MG751820 | 141      | 22      | Yes         | <i>CSP14</i>                   | <i>Oedaleus asiaticus</i>      | ATI99853       | 3.00E-30 | 57           |
| <i>ClivCSP10</i> | MG751821 | 120      | 17      | Yes         | <i>CSP2</i>                    | <i>Apolygus lucorum</i>        | AGD80082       | 5.00E-35 | 50           |
| <i>ClivCSP11</i> | MG751822 | 127      | 16      | Yes         | <i>CSP3</i>                    | <i>Apolygus lucorum</i>        | AEP95757       | 9.00E-67 | 76           |
| <i>ClivCSP12</i> | MG751823 | 157      | 21      | Yes         | <i>CSP9</i>                    | <i>Adelphocoris lineolatus</i> | AMD02858       | 2.00E-33 | 80           |
| <i>ClivNPC2</i>  | MH510335 | 156      | 24      | Yes         | <i>NPC2 homolog isoform X1</i> | <i>Vollenhovia emeryi</i>      | XP_011862436.1 | 7.00E-35 | 40           |

Acc. no.: Accession number; ORF: open reading frame; SP: signal peptides; aa: amino acids.

**Supplementary Table S3.** Summary of *OR*, *IR*, *GR* and *SNMP* genes identified in *C. lividipennis*.

| Gene name          | Acc. no. | ORF (aa) | TMD | Full length | BLASTX best hit                    |                                |                |           |              |
|--------------------|----------|----------|-----|-------------|------------------------------------|--------------------------------|----------------|-----------|--------------|
|                    |          |          |     |             | Gene name                          | Species                        | Acc. no.       | E value   | Identity (%) |
| <i>ClivOR1</i>     | MG770189 | 410      | 6   | Yes         | <i>OR60</i>                        | <i>Apolygus lucorum</i>        | AQM56066       | 1.00E-82  | 47           |
| <i>ClivOR2</i>     | MG770190 | 314      | 4   | Yes         | <i>OR43</i>                        | <i>Apolygus lucorum</i>        | AQM56049       | 7.00E-91  | 43           |
| <i>ClivOR3</i>     | MG770191 | 416      | 5   | Yes         | <i>OR51</i>                        | <i>Apolygus lucorum</i>        | AQM56057       | 3.00E-162 | 55           |
| <i>ClivOR4</i>     | MG770192 | 379      | 5   | Yes         | <i>OR61</i>                        | <i>Apolygus lucorum</i>        | AQM56067       | 4.00E-94  | 77           |
| <i>ClivOR5</i>     | MG770193 | 375      | 6   | Yes         | <i>OR34</i>                        | <i>Apolygus lucorum</i>        | AQM56040       | 1.00E-112 | 56           |
| <i>ClivOR6</i>     | MG770194 | 391      | 8   | Yes         | <i>OR99</i>                        | <i>Apolygus lucorum</i>        | AQM56105       | 8.00E-119 | 43           |
| <i>ClivOR7</i>     | MG770195 | 420      | 5   | Yes         | <i>OR7</i>                         | <i>Apolygus lucorum</i>        | AQM56015       | 8.00E-97  | 40           |
| <i>ClivOR8</i>     | MG770196 | 435      | 6   | Yes         | <i>OR52</i>                        | <i>Apolygus lucorum</i>        | AQM56058       | 6.00E-41  | 28           |
| <i>ClivOR9</i>     | MG770197 | 434      | 6   | Yes         | <i>OR85</i>                        | <i>Apolygus lucorum</i>        | AQM56091       | 1.00E-110 | 45           |
| <i>ClivOR10</i>    | MG770198 | 442      | 5   | Yes         | <i>OR62</i>                        | <i>Apolygus lucorum</i>        | AQM56068       | 2.00E-91  | 63           |
| <i>ClivOR11</i>    | MG770199 | 399      | 6   | Yes         | <i>OR40</i>                        | <i>Apolygus lucorum</i>        | ANC27967       | 1.00E-166 | 57           |
| <i>ClivOR12</i>    | MG770200 | 391      | 3   | Yes         | <i>OR67</i>                        | <i>Apolygus lucorum</i>        | AQM56073       | 1.00E-144 | 53           |
| <i>ClivOR13</i>    | MG770201 | 423      | 6   | Yes         | <i>OR17</i>                        | <i>Apolygus lucorum</i>        | AQM56025       | 4.00E-134 | 45           |
| <i>ClivOR14</i>    | MG770202 | 401      | 4   | Yes         | <i>OR100</i>                       | <i>Apolygus lucorum</i>        | AQM56106       | 3.00E-162 | 55           |
| <i>ClivORCO</i>    | MG770203 | 490      | 6   | Yes         | <i>ORCO</i>                        | <i>Adelphocoris lineolatus</i> | AHC72292       |           | 0 89         |
| <i>ClivIR1</i>     | MG770204 | 244      | 2   | No          | <i>IR40a</i>                       | <i>Nilaparvata lugens</i>      | XP_022197172   | 6.00E-93  | 57           |
| <i>ClivIR2</i>     | MG770205 | 419      | 3   | Yes         | <i>IR41a</i>                       | <i>Ostrinia furnacalis</i>     | BAR64800       | 3.00E-58  | 31           |
| <i>ClivIR3</i>     | MG770206 | 662      | 2   | Yes         | <i>IR</i>                          | <i>Eogystia hippophaecola</i>  | AOG12846       | 4.00E-63  | 30           |
| <i>ClivIR4</i>     | MG770207 | 552      | 2   | Yes         | <i>IR64a</i>                       | <i>Ostrinia furnacalis</i>     | BAR64801       | 3.00E-24  | 22           |
| <i>ClivIR5</i>     | MG770208 | 198      | 1   | No          | <i>IR24</i>                        | <i>Locusta migratoria</i>      | ALD51351       | 8.00E-25  | 38           |
| <i>ClivIR6</i>     | MG770209 | 504      | 3   | Yes         | <i>IR40a isoform X2</i>            | <i>Myzus persicae</i>          | XP_022182311   | 7.00E-163 | 48           |
| <i>ClivGR1</i>     | MH510328 | 364      | 8   | Yes         | <i>GR121</i>                       | <i>Tribolium castaneum</i>     | EFA07618.1     | 5.00E-05  | 26           |
| <i>ClivGR2</i>     | MH510329 | 355      | 7   | Yes         | <i>GR3</i>                         | <i>Nasonia vitripennis</i>     | NP_001164386.1 | 2.00E-05  | 28           |
| <i>ClivGR3</i>     | MH510330 | 362      | 7   | Yes         | <i>GR for sugar taste 43a-like</i> | <i>Nilaparvata lugens</i>      | XP_022196424.1 | 9.00E-09  | 28           |
| <i>ClivSNMP1</i>   | MH510331 | 557      | 2   | Yes         | <i>SNMP 1-like</i>                 | <i>Nilaparvata lugens</i>      | XP_022198804.1 | 4.00E-158 | 51           |
| <i>ClivSNMP2-1</i> | MH510333 | 560      | 2   | Yes         | <i>SNMP 2-like</i>                 | <i>Athalia rosae</i>           | XP_012267137.1 | 4.00E-91  | 36           |
| <i>ClivSNMP2-2</i> | MH510334 | 507      | 2   | Yes         | <i>SNMP 2-like isoform X1</i>      | <i>Nilaparvata lugens</i>      | XP_022190215.1 | 1.00E-94  | 35           |

Acc. no.: Accession number; ORF: open reading frame; TMD: transmembrane domains; aa: amino acids.



**Supplementary Table S4:** Primers used in PCR assays.

| Gene           | Direction | Sequence (5'-3')      | Product (bp) |
|----------------|-----------|-----------------------|--------------|
| <i>CLOBP11</i> | F         | TTTTTGGTCCTTGGCGTATC  | 529          |
|                | R         | CTTTTGGGCACTTTTCCAAC  |              |
| <i>CLOBP12</i> | F         | GGCCTTCTAATGGCTTTCCT  | 456          |
|                | R         | TTTTCCTCGAAGCGAAGTGT  |              |
| <i>CLOBP13</i> | F         | CTCGTGTGCGCTCTTCTTTT  | 410          |
|                | R         | CAATCCGCTAGCTTGTAGGC  |              |
| <i>CLOBP14</i> | F         | CGGCTAACATGGAAGCTGTT  | 512          |
|                | R         | CCTCGACTCATTGCAGGACT  |              |
| <i>CLOBP15</i> | F         | GCTTTGACGTCCCAAATTGT  | 410          |
|                | R         | TCATAACCGTGGTCTTTGTTG |              |
| <i>CLOBP16</i> | F         | CTTTTATTGGGCGTTGCTGT  | 505          |
|                | R         | TGCATGCCTCACTTTCAGTC  |              |
| <i>CLOBP17</i> | F         | GGCACTCCTCATTGCCTTC   | 402          |
|                | R         | CTGGGGAAGAAGTTGACCTG  |              |
| <i>CLOBP18</i> | F         | ACCTGCGATGCTTACGACTT  | 635          |
|                | R         | TGCTTGAATTGGAGTGCTTG  |              |
| <i>CLCSP6</i>  | F         | CACGGGCCAAGAATCATATC  | 319          |
|                | R         | CGCTTTTCTCTGCTCTTCGT  |              |
| <i>CLCSP7</i>  | F         | TGGCGCTATTTGTTGCTGTA  | 308          |
|                | R         | TGATGGGTCGTAAATGGACA  |              |
| <i>CLCSP8</i>  | F         | CCGCAAGAGGATTTGTCATT  | 320          |
|                | R         | TCCATGAAGGCTTTCACCTTG |              |
| <i>CLCSP9</i>  | F         | TCCGTCTGTGTCACTCTCA   | 418          |
|                | R         | CGGTCTTGAAGAGTCGTCGT  |              |
| <i>CLCSP10</i> | F         | TTCGATCGCTATGTGTCTCG  | 303          |
|                | R         | TATTGTCCTTCGGGGTCGTA  |              |
| <i>CLCSP11</i> | F         | CATCGACCTCGAAGAGATCC  | 301          |
|                | R         | GGGAAGTTTGATTCCACGTT  |              |
| <i>CLCSP12</i> | F         | CTTTTGGTTGCCAGCATCTT  | 419          |
|                | R         | GACCGGTTGATTGTCGGTAG  |              |

---

|               |   |                       |     |
|---------------|---|-----------------------|-----|
| <i>CLOR1</i>  | F | ATGGAAGACGACCCAGACAG  | 801 |
|               | R | TTGGCTGATCCAATACGTGA  |     |
| <i>CLOR2</i>  | F | CCGTA CTCAGAACACGCTGA | 800 |
|               | R | TCCTCTTCACCGTTGACAATC |     |
| <i>CLOR3</i>  | F | AACACTTCCTTGCTCGCCTA  | 829 |
|               | R | TGGCGAGGAAAATGAAGAAG  |     |
| <i>CLOR4</i>  | F | CCCAGTAAATTCTCGACCA   | 845 |
|               | R | CGAATGTCGAGTTTGGGTCT  |     |
| <i>CLOR5</i>  | F | CGTGTCTCCAATCAACCTT   | 897 |
|               | R | ACGTGAAGCCAGTTGCTTTT  |     |
| <i>CLOR6</i>  | F | CATGTCAACGGTCAATCGAG  | 813 |
|               | R | AACATTTTCACGCCTTGTC   |     |
| <i>CLOR7</i>  | F | AATTGGCCGCTCTTTATCCT  | 847 |
|               | R | ATAAGAGCTCCGCCATCAA   |     |
| <i>CLOR8</i>  | F | TGAGGACAACGTGGATTGA   | 843 |
|               | R | TCCCCGAAGTAACTGACCAC  |     |
| <i>CLOR9</i>  | F | ACTTAGGACAGGCTGCCAGA  | 821 |
| <i>CLOR10</i> | R | CATGCAGAGCAGAAGAGCTG  | 843 |
|               | F | CTGATCGGAGTGATCGGATT  |     |
|               | R | AGCGGTCAGCATGCTAAAAT  |     |
| <i>CLOR11</i> | F | TCGGCTCGTCTTTCAAGTTT  | 811 |
|               | R | AGCAAAAGCTAAGCCAACCA  |     |
| <i>CLOR12</i> | F | CAGTGGTCACCAACGATTTG  | 818 |
|               | R | TTTCAACGTCCCTTCATTCC  |     |
| <i>CLOR13</i> | F | CCTAGTCGCAATGGGTTGTT  | 862 |
|               | R | GGGCCATAAGTACCATCGTG  |     |
| <i>CLOR14</i> | F | CACGCTCTGGATCGTCTACA  | 834 |
|               | R | AATCGAGAAACGAGCCTTGA  |     |
| <i>CLORCO</i> | F | GAAATACCGCAGCTCATGGT  | 817 |
|               | R | AAAATTTGGCTCCTGACACG  |     |
| <i>CLIR1</i>  | F | ATGAGAGAAGCTTGGCCGTA  | 633 |
|               | R | ATGTTTCCCTTCCTCCCAAT  |     |
| <i>CLIR2</i>  | F | TCTTCCCTTACATGCCATCC  | 851 |
|               | R | GTGTTTCGTTGGACCTGGATT |     |
| <i>CLIR3</i>  | F | TGCCGTACGGTAACAATGAA  | 818 |

---

---

|                  |   |                       |      |
|------------------|---|-----------------------|------|
|                  | R | TATTCCAAGGCCGATGCTAC  |      |
| <i>CLIR4</i>     | F | CCTCTCTTGCCTGAAAAACG  | 864  |
|                  | R | ATCAGCGACAAGCCAGCTAT  |      |
| <i>CLIR5</i>     | F | CAAATTTTGGCGACGCTATT  | 505  |
|                  | R | AGATCATGCTCCGAAAATGG  |      |
| <i>CLIR6</i>     | F | ATGAGAGAAGCTTGGCCGTA  | 856  |
|                  | R | ATGGGAGTCTCTCCGGTTTT  |      |
| <i>CLGR1</i>     | F | ACATCCTTCACCGTTGCTTC  | 806  |
|                  | R | GAAACCACAAGCGGTGAAAT  |      |
| <i>CLGR2</i>     | F | CCTTTGTTTCGAGGAAAGCAA | 811  |
|                  | R | CCACAATGAACATCGTCGTC  |      |
| <i>CLGR3</i>     | F | CACCTCCTATCTTGGCCTTC  | 850  |
|                  | R | ATGTGACCAAGGGGTAACCA  |      |
| <i>CLNPC2</i>    | F | TTTGTGCTGGGATCCTGATA  | 408  |
|                  | R | CCTCGCTCTGTTTCATCCTCT |      |
| <i>CLSNMP1-1</i> | F | GGCCAAATTCCCAATATCCT  | 1141 |
|                  | R | GTGCAATCCTTCGACCTCAT  |      |
| <i>CLSNMP2-1</i> | F | TTTCCTAAACAACGCCATCC  | 923  |
|                  | R | GCCCGATGATGTGGTAGAGT  |      |
| <i>CLSNMP2-2</i> | F | ACCAGAAGTCATGGGCAAAG  | 982  |
|                  | R | GCCAACGAGTAGCATCAACA  |      |

---

**Supplementary Table S5:** GenBank accession numbers of insect *OBP*s, *CSP*s and *OR*s used in the phylogenetic tree.

| Gene                            | Acc. no. | Gene             | Acc. no. | Gene             | Acc. no. |
|---------------------------------|----------|------------------|----------|------------------|----------|
| <i>Cyrtorhinus lividipennis</i> |          |                  |          |                  |          |
| <i>ClivOBP1</i>                 | KY462016 | <i>ClivOBP7</i>  | KY462022 | <i>ClivOBP13</i> | MG751810 |
| <i>ClivOBP2</i>                 | KY462017 | <i>ClivOBP8</i>  | KY462023 | <i>ClivOBP14</i> | MG751811 |
| <i>ClivOBP3</i>                 | KY462018 | <i>ClivOBP9</i>  | KY462024 | <i>ClivOBP15</i> | MG751812 |
| <i>ClivOBP4</i>                 | KY462019 | <i>ClivOBP10</i> | KY462025 | <i>ClivOBP16</i> | MG751813 |
| <i>ClivOBP5</i>                 | KY462020 | <i>ClivOBP11</i> | MG751808 | <i>ClivOBP17</i> | MG751814 |
| <i>ClivOBP6</i>                 | KY462021 | <i>ClivOBP12</i> | MG751809 | <i>ClivOBP18</i> | MG751815 |
| <i>ClivCSP1</i>                 | KY462026 | <i>ClivCSP5</i>  | KY462030 | <i>ClivCSP9</i>  | MG751820 |
| <i>ClivCSP2</i>                 | KY462027 | <i>ClivCSP6</i>  | MG751817 | <i>ClivCSP10</i> | MG751821 |
| <i>ClivCSP3</i>                 | KY462028 | <i>ClivCSP7</i>  | MG751818 | <i>ClivCSP11</i> | MG751822 |
| <i>ClivCSP4</i>                 | KY462029 | <i>ClivCSP8</i>  | MG751819 | <i>ClivCSP12</i> | MG751823 |
| <i>ClivOR1</i>                  | MG770189 | <i>ClivOR6</i>   | MG770194 | <i>ClivOR11</i>  | MG770199 |
| <i>ClivOR2</i>                  | MG770190 | <i>ClivOR7</i>   | MG770195 | <i>ClivOR12</i>  | MG770200 |
| <i>ClivOR3</i>                  | MG770191 | <i>ClivOR8</i>   | MG770196 | <i>ClivOR13</i>  | MG770201 |
| <i>ClivOR4</i>                  | MG770192 | <i>ClivOR9</i>   | MG770197 | <i>ClivOR14</i>  | MG770202 |
| <i>ClivOR5</i>                  | MG770193 | <i>ClivOR10</i>  | MG770198 | <i>ClivORCO</i>  | MG770203 |
| <i>Apolygus lucorum</i>         |          |                  |          |                  |          |
| <i>AlucOBP1</i>                 | AEA07705 | <i>AlucOBP14</i> | AMQ76467 | <i>AlucOBP27</i> | AMQ76480 |
| <i>AlucOBP2</i>                 | AEA07706 | <i>AlucOBP15</i> | AMQ76468 | <i>AlucOBP28</i> | AMQ76481 |
| <i>AlucOBP3</i>                 | AEA07661 | <i>AlucOBP16</i> | AMQ76469 | <i>AlucOBP29</i> | AMQ76482 |
| <i>AlucOBP4</i>                 | AEA07662 | <i>AlucOBP17</i> | AMQ76470 | <i>AlucOBP30</i> | AMQ76483 |
| <i>AlucOBP5</i>                 | AEA07663 | <i>AlucOBP18</i> | AMQ76471 | <i>AlucOBP31</i> | AMQ76484 |
| <i>AlucOBP6</i>                 | AEA07664 | <i>AlucOBP19</i> | AMQ76472 | <i>AlucOBP32</i> | AMQ76485 |
| <i>AlucOBP7</i>                 | AFJ54048 | <i>AlucOBP20</i> | AMQ76473 | <i>AlucOBP33</i> | AMQ76486 |
| <i>AlucOBP8</i>                 | AFJ54049 | <i>AlucOBP21</i> | AMQ76474 | <i>AlucOBP34</i> | AMQ76487 |
| <i>AlucOBP9</i>                 | AFJ54050 | <i>AlucOBP22</i> | AMQ76475 | <i>AlucOBP35</i> | AMQ76488 |
| <i>AlucOBP10</i>                | AFJ54051 | <i>AlucOBP23</i> | AMQ76476 | <i>AlucOBP36</i> | AMQ76489 |

---

|                  |          |                  |          |                  |          |
|------------------|----------|------------------|----------|------------------|----------|
| <i>AlucOBP11</i> | AFJ54052 | <i>AlucOBP24</i> | AMQ76477 | <i>AlucOBP37</i> | AMQ76490 |
| <i>AlucOBP12</i> | AFJ54053 | <i>AlucOBP25</i> | AMQ76478 | <i>AlucOBP38</i> | AMQ76491 |
| <i>AlucOBP13</i> | AMQ76466 | <i>AlucOBP26</i> | AMQ76479 |                  |          |
| <i>AlucCSP1</i>  | AGD80081 | <i>AlucCSP4</i>  | AGD80084 | <i>AlucCSP7</i>  | AGD80087 |
| <i>AlucCSP2</i>  | AGD80082 | <i>AlucCSP5</i>  | AGD80085 | <i>AlucCSP8</i>  | AGD80088 |
| <i>AlucCSP3</i>  | AGD80083 | <i>AlucCSP6</i>  | AGD80086 |                  |          |
| <i>AlucORCO</i>  | AHC72290 | <i>AlucOR88</i>  | AQM56094 | <i>AlucOR65</i>  | AQM56071 |
| <i>AlucOR46</i>  | ANE06404 | <i>AlucOR87</i>  | AQM56093 | <i>AlucOR63</i>  | AQM56069 |
| <i>AlucOR107</i> | AQM56113 | <i>AlucOR86</i>  | AQM56092 | <i>AlucOR59</i>  | AQM56065 |
| <i>AlucOR106</i> | AQM56112 | <i>AlucOR85</i>  | AQM56091 | <i>AlucOR58</i>  | AQM56064 |
| <i>AlucOR105</i> | AQM56111 | <i>AlucOR84</i>  | AQM56090 | <i>AlucOR57</i>  | AQM56063 |
| <i>AlucOR103</i> | AQM56109 | <i>AlucOR81</i>  | AQM56087 | <i>AlucOR56</i>  | AQM56062 |
| <i>AlucOR100</i> | AQM56106 | <i>AlucOR79</i>  | AQM56085 | <i>AlucOR54</i>  | AQM56060 |
| <i>AlucOR99</i>  | AQM56105 | <i>AlucOR78</i>  | AQM56084 | <i>AlucOR52</i>  | AQM56058 |
| <i>AlucOR97</i>  | AQM56103 | <i>AlucOR75</i>  | AQM56081 | <i>AlucOR51</i>  | AQM56057 |
| <i>AlucOR96</i>  | AQM56102 | <i>AlucOR73</i>  | AQM56079 | <i>AlucOR50</i>  | AQM56056 |
| <i>AlucOR94</i>  | AQM56100 | <i>AlucOR71</i>  | AQM56077 | <i>AlucOR48</i>  | AQM56054 |
| <i>AlucOR93</i>  | AQM56099 | <i>AlucOR70</i>  | AQM56076 | <i>AlucOR47</i>  | AQM56053 |
| <i>AlucOR90</i>  | AQM56096 | <i>AlucOR68</i>  | AQM56074 | <i>AlucOR45</i>  | AQM56051 |
| <i>AlucOR89</i>  | AQM56095 | <i>AlucOR67</i>  | AQM56073 | <i>AlucOR43</i>  | AQM56049 |
| <i>AlucOR22</i>  | AQM56030 | <i>AlucOR23</i>  | AQM56031 | <i>AlucOR42</i>  | AQM56048 |
| <i>AlucOR21</i>  | AQM56029 | <i>AlucOR25</i>  | AQM56033 | <i>AlucOR40</i>  | AQM56046 |
| <i>AlucOR20</i>  | AQM56028 | <i>AlucOR27</i>  | AQM56035 | <i>AlucOR39</i>  | AQM56045 |
| <i>AlucOR17</i>  | AQM56025 | <i>AlucOR29</i>  | AQM56036 | <i>AlucOR37</i>  | AQM56043 |
| <i>AlucOR16</i>  | AQM56024 | <i>AlucOR31</i>  | AQM56037 | <i>AlucOR36</i>  | AQM56042 |
| <i>AlucOR14</i>  | AQM56022 | <i>AlucOR32</i>  | AQM56038 | <i>AlucOR34</i>  | AQM56040 |
| <i>AlucOR13</i>  | AQM56021 | <i>AlucOR5</i>   | AQM56013 | <i>AlucOR30</i>  | AKS44363 |
| <i>AlucOR11</i>  | AQM56019 | <i>AlucOR4</i>   | AQM56012 | <i>AlucOR28</i>  | AKS44362 |
| <i>AlucOR10</i>  | AQM56018 | <i>AlucOR3</i>   | AQM56011 | <i>AlucOR18</i>  | AKS44361 |
| <i>AlucOR9</i>   | AQM56017 | <i>AlucOR2</i>   | AQM56010 | <i>AlucOR12</i>  | AKS44360 |

---

---

|                                |          |                  |          |                  |           |
|--------------------------------|----------|------------------|----------|------------------|-----------|
| <i>AlucOR7</i>                 | AQM56015 | <i>AlucOR1</i>   | AQM56009 |                  |           |
| <i>Adelphocoris lineolatus</i> |          |                  |          |                  |           |
| <i>AlinOBP1</i>                | ACZ58027 | <i>AlinOBP7</i>  | ACZ58085 | <i>AlinOBP13</i> | ACZ580840 |
| <i>AlinOBP2</i>                | ACZ58028 | <i>AlinOBP8</i>  | ACZ58079 | <i>AlinOBP14</i> | ACZ58086  |
| <i>AlinOBP3</i>                | ACZ58029 | <i>AlinOBP9</i>  | ACZ58080 | <i>AlinOBP15</i> | AMD02855  |
| <i>AlinOBP4</i>                | ACZ58030 | <i>AlinOBP10</i> | ACZ58081 | <i>AlinOBP16</i> | AMD02856  |
| <i>AlinOBP5</i>                | ACZ58031 | <i>AlinOBP11</i> | ACZ58082 | <i>AlinOBP17</i> | AMD02857  |
| <i>AlinOBP6</i>                | ACZ58032 | <i>AlinOBP12</i> | ACZ58083 |                  |           |
| <i>AlinCSP1</i>                | ACZ58019 | <i>AlinCSP4</i>  | ACZ58022 | <i>AlinCSP7</i>  | ACZ58025  |
| <i>AlinCSP2</i>                | ACZ58021 | <i>AlinCSP5</i>  | ACZ58023 | <i>AlinCSP8</i>  | ACZ58026  |
| <i>AlinCSP3</i>                | ACZ58020 | <i>AlinCSP6</i>  | ACZ58024 |                  |           |
| <i>Lygus lineolaris</i>        |          |                  |          |                  |           |
| <i>LlinOBP1</i>                | AHF71028 | <i>LlinOBP12</i> | AHF71039 | <i>LlinOBP23</i> | AHF71053  |
| <i>LlinOBP2</i>                | AHF71029 | <i>LlinOBP13</i> | AHF71040 | <i>LlinOBP24</i> | AHF71055  |
| <i>LlinOBP3</i>                | AHF71030 | <i>LlinOBP14</i> | AHF71041 | <i>LlinOBP25</i> | AHF71056  |
| <i>LlinOBP4</i>                | AHF71031 | <i>LlinOBP15</i> | AHF71042 | <i>LlinOBP26</i> | AHF71057  |
| <i>LlinOBP5</i>                | AHF71032 | <i>LlinOBP16</i> | AHF71044 | <i>LlinOBP27</i> | AHF71058  |
| <i>LlinOBP6</i>                | AHF71033 | <i>LlinOBP17</i> | AHF71045 | <i>LlinOBP28</i> | AHF71059  |
| <i>LlinOBP7</i>                | AHF71034 | <i>LlinOBP18</i> | AHF71046 | <i>LlinOBP29</i> | AHF71060  |
| <i>LlinOBP8</i>                | AHF71035 | <i>LlinOBP19</i> | AHF71049 | <i>LlinOBP30</i> | AHF71061  |
| <i>LlinOBP9</i>                | AHF71036 | <i>LlinOBP20</i> | AHF71050 | <i>LlinOBP31</i> | AHF71062  |
| <i>LlinOBP10</i>               | AHF71037 | <i>LlinOBP21</i> | AHF71051 | <i>LlinOBP32</i> | AHF71063  |
| <i>LlinOBP11</i>               | AHF71038 | <i>LlinOBP22</i> | AHF71052 |                  |           |
| <i>Nilaparvata lugens</i>      |          |                  |          |                  |           |
| <i>NlugOBP1</i>                | ACI30679 | <i>NlugOBP4</i>  | AGZ04895 | <i>NlugOBP7</i>  | AGZ04898  |
| <i>NlugOBP2</i>                | ACI30680 | <i>NlugOBP5</i>  | AGZ04896 | <i>NlugOBP8</i>  | AGZ04899  |
| <i>NlugOBP3</i>                | ACI30681 | <i>NlugOBP6</i>  | AGZ04897 |                  |           |
| <i>NlugCSP1</i>                | ASL05006 | <i>NlugCSP5</i>  | ASL04982 | <i>NlugCSP9</i>  | ASL05050  |
| <i>NlugCSP2</i>                | ASL05045 | <i>NlugCSP6</i>  | ASL05030 | <i>NlugCSP10</i> | ASL05051  |
| <i>NlugCSP3</i>                | ASL05046 | <i>NlugCSP7</i>  | ASL05048 | <i>NlugCSP11</i> | ASL05052  |

---

---

|                              |              |                                 |              |                          |             |
|------------------------------|--------------|---------------------------------|--------------|--------------------------|-------------|
| <i>NlugCSP4</i>              | ASL05047     | <i>NlugCSP8</i>                 | ASL05049     |                          |             |
| <i>NlugORCO</i>              | XP_022185660 | <i>NlugOR63a-likee</i>          | XP_022189749 | <i>NlugOR43a-like</i>    | XP_02220474 |
| <i>NlugOR46a</i>             | XP_022185545 | <i>NlugOR23a-like</i>           | XP_022199828 | <i>NlugOR56a-like</i>    | XP_02220034 |
| <i>NlugOR83a-like</i>        | XP_022200228 | <i>NlugOR43a-likeisoform X2</i> | XP_022199283 |                          |             |
| <i>NlugOROr2-like</i>        | XP_022192649 | <i>NlugOR7a-like</i>            | XP_022207573 |                          |             |
| <i>Sogatella furcifera</i>   |              |                                 |              |                          |             |
| <i>SfurOBP1</i>              | AGZ04901     | <i>SfurOBP5</i>                 | AGZ04905     | <i>SfurOBP9</i>          | AGZ04909    |
| <i>SfurOBP2</i>              | AGZ04902     | <i>SfurOBP6</i>                 | AGZ04906     | <i>SfurOBP10</i>         | AGZ04910    |
| <i>SfurOBP3</i>              | AGZ04903     | <i>SfurOBP7</i>                 | AGZ04907     |                          |             |
| <i>SfurOBP4</i>              | AGZ04904     | <i>SfurOBP8</i>                 | AGZ04908     |                          |             |
| <i>Laodelphax striatella</i> |              |                                 |              |                          |             |
| <i>LstrOBP1</i>              | AGZ04920     | <i>LstrOBP4</i>                 | AGZ04923     | <i>LstrOBP7</i>          | AGZ04926    |
| <i>LstrOBP2</i>              | AGZ04921     | <i>LstrOBP5</i>                 | AGZ04924     | <i>LstrOBP8</i>          | AGZ04927    |
| <i>LstrOBP3</i>              | AGZ04922     | <i>LstrOBP6</i>                 | AGZ04925     | <i>LstrOBP9</i>          | AGZ04928    |
| <i>LstrCSP1</i>              | AGZ04929     | <i>LstrCSP5</i>                 | AGZ04933     | <i>LstrCSP9</i>          | AGZ04937    |
| <i>LstrCSP2</i>              | AGZ04930     | <i>LstrCSP6</i>                 | AGZ04934     | <i>LstrCSP10</i>         | AGZ04938    |
| <i>LstrCSP3</i>              | AGZ04931     | <i>LstrCSP7</i>                 | AGZ04935     | <i>LstrCSP11</i>         | AGZ04939    |
| <i>LstrCSP4</i>              | AGZ04932     | <i>LstrCSP8</i>                 | AGZ04936     | <i>LstrCSP12</i>         | AGZ04940    |
| <i>Myzus persicae</i>        |              |                                 |              |                          |             |
| <i>MperOR46a-like</i>        | XP_022178692 | <i>MperOR22c-like</i>           | XP_022167641 | <i>MperORCOisoformX1</i> | XP_02216289 |
| <i>MperOR2a-like</i>         | XP_022175226 | <i>MperOR67a-like</i>           | XP_022167526 | <i>MperOR4-like</i>      | XP_02216456 |
| <i>MperOR43b-like</i>        | XP_022173211 | <i>MperORCOisoformX2</i>        | XP_022162893 | <i>MperOR33b-like</i>    | XP_02216909 |
| <i>Acyrtosiphon pisum</i>    |              |                                 |              |                          |             |
| <i>ApisOR43</i>              | AQS60755     | <i>ApisOR17</i>                 | AQS60746     | <i>ApisOR31</i>          | AQS60750    |
| <i>ApisOR42</i>              | AQS60754     | <i>ApisOR10</i>                 | AQS60745     | <i>ApisOR25</i>          | AQS60749    |
| <i>ApisOR39</i>              | AQS60753     | <i>ApisOR5</i>                  | AQS60744     | <i>ApisOR23</i>          | AQS60748    |
| <i>ApisOR38</i>              | AQS60752     | <i>ApisOR4</i>                  | AQS60743     | <i>ApisOR20</i>          | AQS60747    |
| <i>ApisOR37</i>              | AQS60751     | <i>ApisOR2</i>                  | AQS60742     | <i>ApisORCO</i>          | AQS60741    |

---

**Supplementary Table S6:** Primers used in qPCR and RNAi assays.

| Gene           | Direction | Sequence (5'-3')      | Product (bp) |
|----------------|-----------|-----------------------|--------------|
| <i>CLOBP11</i> | F         | ACCCCAACTCATTGAAAACG  | 148          |
|                | R         | GAGCCCCATTTTGGACATTA  |              |
| <i>CLOBP12</i> | F         | AGCTCAGATCGAACCTCAA   | 136          |
|                | R         | ACGTCAAAAACGACGAATCC  |              |
| <i>CLOBP13</i> | F         | AGTAAAGGAGCGGCCAGAGT  | 146          |
|                | R         | CAATCCGCTAGCTTGTAGGC  |              |
| <i>CLOBP14</i> | F         | ACCACCGACGCTGTAGTAGG  | 149          |
|                | R         | TTCCCTGGATTGCTGTCTT   |              |
| <i>CLOBP15</i> | F         | GCTTTGACGTCCCAAATTGT  | 139          |
|                | R         | TGGCGAATTCTTCAACTTCC  |              |
| <i>CLOBP16</i> | F         | ACAAATGCTACGCCAGTTCC  | 144          |
|                | R         | TGCATGCCTCACTTTCAGTC  |              |
| <i>CLOBP17</i> | F         | GTGTACAGCGGAGTCGGATT  | 149          |
|                | R         | TCCTTGGCAGCAATCTCTTT  |              |
| <i>CLOBP18</i> | F         | ACTGCTCGGGTGAATGAAAC  | 140          |
|                | R         | TGCTTGAATTGGAGTGCTTG  |              |
| <i>CLCSP6</i>  | F         | GGACGAAATTTTGAGCAACC  | 147          |
|                | R         | TGTTTTTCGTTGCATTGAGC  |              |
| <i>CLCSP7</i>  | F         | CTATCCCCGAAGTGCTCTCA  | 137          |
|                | R         | TGATGGGTCGTAAATGGACA  |              |
| <i>CLCSP8</i>  | F         | CCGCAAGAGGATTTGTCATT  | 144          |
|                | R         | TTTAACTACGGCAGCGTGTG  |              |
| <i>CLCSP9</i>  | F         | GACAAACTGCGCCAAGTGTA  | 149          |
|                | R         | CATCGTAGCCTTGCCTTTTC  |              |
| <i>CLCSP10</i> | F         | CGGATGCCAAATACCTGAAG  | 149          |
|                | R         | CTTCTCCAAGAGGCTGCTGT  |              |
| <i>CLCSP11</i> | F         | ACAGCAAGAAGGAACGGACA  | 135          |
|                | R         | CCACGTTTTTGAGCTTCCTC  |              |
| <i>CLCSP12</i> | F         | TATTGAAAACCGGGAAGTGC  | 149          |
|                | R         | CGGTTCGATTCGTCCTTATGT |              |



---

|               |   |                       |     |
|---------------|---|-----------------------|-----|
| <i>CLOR1</i>  | F | TTGCTCAAGACGCAGACATC  | 139 |
|               | R | TTTGGACGACTCTGACAACG  |     |
| <i>CLOR2</i>  | F | ACACGCTGAAGCGAAAATCT  | 148 |
|               | R | CCTCTCACCGAATGCAAAAT  |     |
| <i>CLOR3</i>  | F | AATGAAATTTGGCGCTCTGT  | 149 |
|               | R | TGGTGAAATGAGCAGACTCG  |     |
| <i>CLOR4</i>  | F | CCTCGTCCTCCATTTCGATTA | 142 |
|               | R | CGCAATGACGAAGAATCTCA  |     |
| <i>CLOR5</i>  | F | GCAACATTTTGTGCGATTTG  | 137 |
|               | R | GCATGTCCGGTCCTTGATCTT |     |
| <i>CLOR6</i>  | F | TTCTTCGCGATAATCGTTCC  | 138 |
|               | R | GCCAACTCCTTTGTGGTCAT  |     |
| <i>CLOR7</i>  | F | GTGGACGGTCTGAACTGGAT  | 143 |
|               | R | ATAGAGCCCGAACAAGCAAA  |     |
| <i>CLOR8</i>  | F | CGTTTGTCCGGTGGCTAACTT | 148 |
|               | R | TCTTGATGGCATGGTGATGT  |     |
| <i>CLOR9</i>  | F | CAATGCACCCATGTTCACTC  | 142 |
|               | R | TCTGGCAGCCTGTCCTAAGT  |     |
| <i>CLOR10</i> | F | CGTAGGGTACACGGACGACT  | 146 |
|               | R | TTCCGAGAGCCAACATAAGG  |     |
| <i>CLOR11</i> | F | ACAAGCAAATGCTGGGATTC  | 147 |
|               | R | CAGCAAAAGCTAAGCCAACC  |     |
| <i>CLOR12</i> | F | GTGTATTTCTGCGTGGAGCA  | 141 |
|               | R | CCGCACAGGTAGAAGAAAGC  |     |
| <i>CLOR13</i> | F | AATCGTCATGCAGTTCAACG  | 149 |
|               | R | CGTATGCCCGCTTGTTAAGT  |     |
| <i>CLOR14</i> | F | CATGCGAAGCTTACCCTCTC  | 146 |
|               | R | CGCTACGGCCTTATGTTTGT  |     |
| <i>CLORCO</i> | F | GCGCATGGAATCAGGTAAAT  | 139 |
|               | R | GTCGTCCAGGAGAAGACAGC  |     |
| <i>CLIR1</i>  | F | CTCACACATGCTCCTGGAAA  | 143 |
|               | R | TGCCATCCTAACCGAACTTT  |     |
| <i>CLIR2</i>  | F | TGAGAGCGTCTCTGGAATCA  | 150 |
|               | R | GCGCTGCTATAAATGGTGGT  |     |

---

---

|                  |   |                       |     |
|------------------|---|-----------------------|-----|
| <i>CLIR3</i>     | F | GTTCGATCGGAATGTTCGTT  | 150 |
|                  | R | TCCTCGGGATTGTGAGGTAG  |     |
| <i>CLIR4</i>     | F | ATAGCTGGCTTGTCGCTGAT  | 140 |
|                  | R | TTGATTGGGATGTCCGGTTTT |     |
| <i>CLIR5</i>     | F | CTGTGCTGGCAACAAGAAAA  | 147 |
|                  | R | GCCGTAGATGAGCGCTAAAA  |     |
| <i>CLIR6</i>     | F | AGCCCTGCAGAGTCATTCAT  | 146 |
|                  | R | ATTAAAACGAGCGCTCCAAA  |     |
| <i>CLGR1</i>     | F | TATTGTATTGGCGGGATCGT  | 143 |
|                  | R | GTGGCATTTCGATTCGTT    |     |
| <i>CLGR2</i>     | F | TTCGTTGCTGATTGAAATG   | 150 |
|                  | R | CCACAATGAACATCGTCGTC  |     |
| <i>CLGR3</i>     | F | AACCAAAAATGCAGGGAATG  | 144 |
|                  | R | GCGCAAGATAGGAGGTGAAG  |     |
| <i>CLNPC2</i>    | F | CTGTGTGGACAGTGGGATCA  | 137 |
|                  | R | CCTCGCTCTGTTTCATCCTCT |     |
| <i>CLSNMP1</i>   | F | TTGGACCGAAAAATGACACA  | 140 |
|                  | R | TTTATTGCACTCAGGCGTTG  |     |
| <i>CLSNMP2-1</i> | F | GAGCGCAAGTCATTTTCTCC  | 139 |
|                  | R | TCGAGAGGTGCTCCTGTTTT  |     |
| <i>CLSNMP2-2</i> | F | GTTCCAATCGTGCTGTCCTT  | 138 |
|                  | R | TTTTACGGGAACTCCAGTCG  |     |
| <i>CL18S</i>     | F | CGCTAGAAGTCCGTCAGAGC  | 132 |
|                  | R | AAGTGGGAGTCAGGGTCCTT  |     |
| <i>CLRPS15</i>   | F | GGGTACATTGGGGAGTTTGA  | 151 |
|                  | R | GCAGAAGGTTGTTCGTCCAT  |     |
| <i>dsCLOrco</i>  | F | CCTGTATGGGAAAAGACGGA  | 449 |
|                  | R | ACTGTTCCCTCCGTTACACC  |     |
| <i>dsGFP</i>     | F | AAGTTCAGCGTGCCGGCGA   | 414 |
|                  | R | CACCTTGATGCCGTTCTTCT  |     |

---
